# 1 Modeling the metabolic interplay 2 between a parasitic worm and its 3 bacterial endosymbiont allows the 4 identification of novel drug targets 5

6 DM Curran<sup>1,\*</sup>, A Grote<sup>2,\*</sup>, N Nursimulu<sup>1,3</sup>, A Geber<sup>2</sup>, D Voronin<sup>4</sup>, Drew Jones<sup>5</sup>, E  
7 Ghedin<sup>2,6,#</sup>, J Parkinson<sup>1,3,7,8,#</sup>

8 \* These authors contributed equally to this work

9 # Co-corresponding authors

10 <sup>1</sup>Program in Molecular Medicine, Hospital for Sick Children, Toronto, ON, Canada

11 <sup>2</sup>Department of Biology, Center for Genomics & Systems Biology, New York University,  
12 New York, NY, USA

13 <sup>3</sup>Department of Computer Science, University of Toronto, Toronto, ON, Canada

14 <sup>4</sup>New York Blood Center, New York, NY, USA

15 <sup>4</sup>Department of Biochemistry and Molecular Pharmacology, New York University School  
16 of Medicine, New York, NY, USA

17 <sup>5</sup>Department of Epidemiology, College of Global Public Health, New York University,  
18 New York, NY, USA

19 <sup>7</sup>Department of Biochemistry, University of Toronto, Toronto, ON, Canada

20 <sup>8</sup>Department of Molecular Genetics, University of Toronto, Toronto, ON, Canada

21  
22 **Keywords:** Metabolic reconstruction, Flux Balance Analysis, *Brugia malayi*, *Wolbachia*,  
23 metabolomics

## 24 Abstract

25 The filarial nematode *Brugia malayi* represents a leading cause of disability in the  
26 developing world, causing lymphatic filariasis in nearly 40 million people. Currently  
27 available drugs are not well-suited to mass drug administration efforts, so new  
28 treatments are urgently required. One potential vulnerability is the endosymbiotic  
29 bacteria *Wolbachia*—present in many filariae—which is vital to the worm.

30 Genome scale metabolic networks have been used to study prokaryotes and protists  
31 and have proven valuable in identifying therapeutic targets, but only recently have been  
32 applied to eukaryotic organisms. Here, we present iDC625, the first compartmentalized  
33 metabolic model of a parasitic worm. We used this model to show how metabolic  
34 pathway usage allows the worm to adapt to different environments, and predict a set of  
35 99 reactions essential to the survival of *B. malayi*. We validated three of those reactions  
36 with drug tests and demonstrated novel antifilarial properties for all three compounds.

37

## 38 INTRODUCTION

39 Filarial nematodes are responsible for neglected tropical parasitic diseases that are  
40 among the leading causes of morbidity worldwide. One of the most debilitating is  
41 lymphatic filariasis (LF)—also called elephantiasis—which is caused by *Brugia malayi*,  
42 *Brugia timori*, and *Wuchereria bancrofti*. As of 2015, an estimated 38.8 million people  
43 had lymphatic filariasis with an estimated 1 billion people at risk in 72 endemic countries  
44 (Vos *et al.*, 2016). Transmission occurs when microfilariae released by a female worm  
45 within an infected individual circulate in the blood where they are ingested by one of  
46 several species of mosquito. In the insect vector, the larvae undergo development;  
47 during subsequent blood meals, they are transmitted to a mammalian host where the L3  
48 larvae complete their development into adults (Gleave *et al.*, 2016).

49 Current mass drug administration efforts involve a small selection of drugs—  
50 diethylcarbamazine, ivermectin, and albendazole—with limited effectiveness against the  
51 adult stages of the parasites. To prevent transmission and to relieve symptoms,  
52 treatment must continue for the lifespan of the adult worms, which can be up to 15  
53 years (Molyneux *et al.*, 2014). Furthermore, diethylcarbamazine is contraindicated in  
54 regions where *Onchocerca volvulus* or *Loa loa*—other filarial nematodes—are endemic  
55 (Gyapong *et al.*, 2005; Taylor *et al.*, 2010). Ivermectin is also contraindicated in regions  
56 where *L. loa* is co-endemic due to potential life-threatening complications (Gardon *et al.*,  
57 1997; Boussinesq *et al.*, 1998, 2006). While anthelmintic resistance has not yet  
58 manifested as a serious treatment issue in humans as it has in veterinary medicine  
59 (Kaplan and Vidyashankar, 2012), the potential remains a serious threat; emergence of  
60 resistance in these species against diethylcarbamazine (Eberhard *et al.*, 1991),  
61 ivermectin (Awadzi *et al.*, 2004; Eng *et al.*, 2006), and albendazole (Schwab *et al.*,  
62 2005) has been reported for many years.

63 An alternative strategy for treatment has been the use of traditional antibiotics to target  
64 the endosymbiotic bacteria that live within most filarial nematodes. These bacteria are  
65 from the genus *Wolbachia*, specific to each helminth, and found to be essential for adult  
66 worm fitness and reproduction (Taylor *et al.*, 2013). Targeting these bacteria with the  
67 antibiotic doxycycline was shown to reduce numbers of *Wolbachia* present in the

68 worms, sterilize adult females, and reduce symptoms of lymphatic filariasis (Debrah *et*  
69 *al.*, 2009; Rao *et al.*, 2012; Ghedin *et al.*, 2009; Taylor *et al.*, 2010). While antibiotic  
70 treatment remains a viable option for individual patients, long treatment times and  
71 contraindications for children and pregnant women limit its suitability for mass-drug  
72 administration efforts (Taylor *et al.*, 2010). This strategy is ongoing, as recent evidence  
73 suggests that the commonly used antibiotic rifampicin may also possess filaricidal  
74 activity, but these data are preliminary and have not yet been tested in humans  
75 (Aljayyousi *et al.*, 2017). A more recent study proposes faster-acting antibiotics that  
76 belong to the tetracycline class of drugs (Taylor *et al.*, 2019).

77 Considering the limitations of current treatment regimes, there is an urgent need to  
78 identify new drug targets against filarial nematodes that directly impact adult worm  
79 survival and, if possible, are specific enough to avoid the potential complications that  
80 arise in regions co-endemic for *O. volvulus* or *L. loa*. Genome scale metabolic  
81 reconstruction and constraint-based modelling have emerged as effective strategies to  
82 identify critical metabolic enzymes and pathways (Oberhardt *et al.*, 2008; Chavali *et al.*,  
83 2008; Lee *et al.*, 2009; Song *et al.*, 2013), which, due to their importance in energy  
84 production and in generating the building blocks required for growth and survival, are  
85 good potential therapeutic targets (Cotton *et al.*, 2016; Chiappino-Pepe *et al.*, 2017).  
86 These models can be analyzed using flux balance analysis (FBA), an optimization  
87 method that is applied to a metabolic network (reviewed in (Orth *et al.*, 2010)). Briefly, it  
88 calculates the maximum amount of biomass that can be produced given the available  
89 nutrients and the reaction constraints in the model, as well as the flux through each  
90 reaction needed to attain that solution.

91 Here, we describe the first metabolic reconstruction and constraint-based models of *B.*  
92 *malayi*. Using the high quality genome sequence of *B. malayi* (Ghedin *et al.*, 2007), we  
93 first generated a network representation of the parasite's metabolic capabilities.  
94 Integrating previously published stage-specific transcriptome datasets for both *B. malayi*  
95 and its *Wolbachia* end symbiont (Grote *et al.*, 2017), we revealed stage-specific  
96 metabolic dependencies and identified enzymes that are predicted to be effective  
97 targets for drug intervention strategies. In subsequent drug inhibition studies, we

98 validated three of these targets and show the novel antifilarial properties of three human  
99 drugs. To our knowledge, this work represents the first compartmentalized metabolic  
100 model for any parasitic nematode.

101

## 102 RESULTS

103

### 104 ***i*DC625: The first genome scale metabolic model for *B. malayi***

105 To develop a genome scale metabolic model of *B. malayi*, we first used as a scaffold  
106 network a set of enzymes that are homologs of *O. volvulus* and part of a previously  
107 generated metabolic reconstruction for that organism (Cotton *et al.*, 2016). The *B.*  
108 *malayi* network was then manually curated to ensure that the major pathways—such as  
109 the TCA cycle, fatty acid metabolism, and anaerobic metabolism—were complete and  
110 could be used by the model. The model was divided into three compartments  
111 representing the cytosol and mitochondria of *B. malayi*, as well as the *Wolbachia*  
112 endosymbiont. Where orthologous relationships could be inferred, *B. malayi* reactions  
113 were assigned to either the cytosol or mitochondrion on the basis of similar designations  
114 in the *i*CEL1273 metabolic model for *Caenorhabditis elegans* (Safak Yilmaz and  
115 Walhout, 2016). Additional compartment assignments were performed with reference to  
116 literature sources. In the absence of such information, reactions were split into both  
117 cytosolic and mitochondrial forms. Metabolites were confined to a single compartment,  
118 and so they could only participate in reactions in other compartments if shuttled there by  
119 an explicit transport reaction. Most of these transporters were taken from the *i*CEL1273  
120 model, except when contraindicated by (Berg *et al.*, 2002). Since *Wolbachia* lacks the  
121 genes necessary to produce NAD<sup>+</sup>, coenzyme A (CoA), ubiquinol, and folate (Voronin  
122 *et al.*, 2016), reactions were added to allow the transport of each metabolite into the  
123 *Wolbachia* compartment from the cytosol.

124 In order to model *B. malayi* growth with pFBA (parsimonious FBA), we assembled a set  
125 of required biomass metabolites together with their relative abundances. This collection  
126 represents the biomass objective function and is used in constraints-based modeling to  
127 calculate flux distributions for each reaction in the reconstruction. Here we based the  
128 objective function on a previously defined function generated for *O. volvulus* (Cotton *et*  
129 *al.*, 2016; see Supplemental Methods for details), modified with *B. malayi* and  
130 *Wolbachia* specific values for DNA, RNA and amino acid distributions that were

131 obtained from previously published studies (Ghedini *et al.*, 2007; Foster *et al.*, 2005;  
 132 Grote *et al.*, 2017).

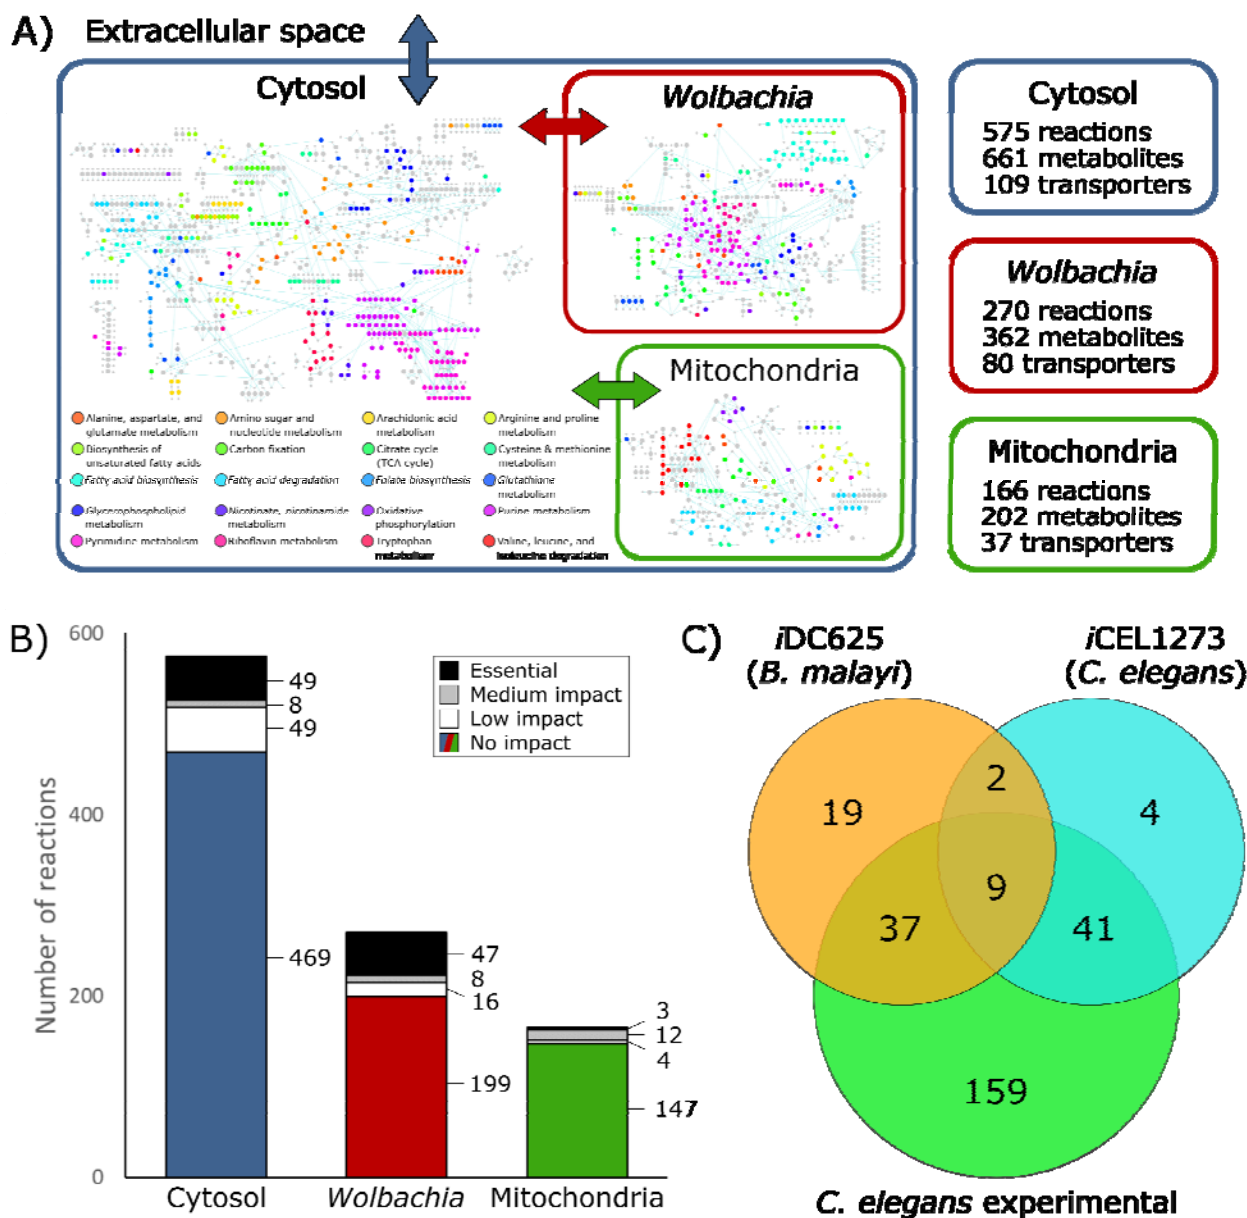

133

134 **Figure 1. The iDC625 genome scale metabolic model.** A) Network representation of  
 135 our metabolic reconstruction, where the large coloured dots represent reactions. B)  
 136 Breakdown of the essentiality of the model reactions by their compartment. No impact  
 137 indicates the model's optimized biomass objective function was unaffected; low impact  
 138 indicates 100% > biomass > 90% of the original; medium impact indicates 90% ≥  
 139 biomass > 0%; and essential indicates that no biomass was produced. C) A Venn

140 diagram of the overlap in predicted essential reactions between our model, the  
141 previously published *iCEL1273 C. elegans* metabolic reconstruction, and experimentally  
142 determined essential reactions in *C. elegans*. All three sets of reactions represent only  
143 those that are present in both *iDC625* and *iCEL1273*.

144

145 The final reconstruction, designated *iDC625*, contains 1,266 total reactions involving  
146 1,252 total metabolites. Of the 1,266 reactions, 1,011 represent enzymes of which 849  
147 are associated with 625 genes; 575 of these enzymatic reactions are associated with  
148 the cytosolic compartment, 166 with the mitochondria, and 270 with *Wolbachia* (**Figure**  
149 **1**). Of the remaining reactions, 226 are associated with transport across compartments,  
150 of which 37 represent metabolite exchange between the mitochondria and cytosol, 80  
151 between *Wolbachia* and the cytosol, and the remaining 109 representing metabolite  
152 exchange between the cytosol and the extracellular milieu. A further 29 reactions are  
153 artificial, used only to organize the biomass components required for the objective  
154 function. Of the 1,252 metabolites, 661 are associated with the cytosol, 202 with the  
155 mitochondrion, 362 with the *Wolbachia*, and 27 are used in the artificial conversions of  
156 biomass components.

157 We also used life stage-specific gene expression data to constrain the reactions of  
158 *iDC625*. In total, we obtained relative expression data for 11,840 *B. malayi* and 823  
159 *Wolbachia* genes across ten different points in the worm's lifecycle; 87.6% of the *B.*  
160 *malayi* genes and 96.4% of the *Wolbachia* genes were expressed in at least one stage.  
161 This yielded 11 total models: unconstrained (open), L3, L3 6 days post-infection (L3D6),  
162 L3 9 days post-infection (L3D9), L4, adult female 30 days post-infection (F30), adult  
163 female 42 days post-infection (F42), adult female 120 days post-infection (F120), adult  
164 male 30 days post-infection (M30), adult male 42 days post-infection (M42), and adult  
165 male 120 days post-infection (M120).

166

167 ***Wolbachia* load impacts model performance**



168 Since the presence of *Wolbachia* directly impacts model dynamics, both through the  
169 production of metabolites that contribute to the biomass objective function as well as the  
170 consumption of metabolites to maintain its own growth, the relative weight between  
171 bacteria and worm must be considered in the model. This weight is implemented by  
172 weighting the *Wolbachia* contribution to the biomass objective function, as well as  
173 constraining reactions assigned to the endosymbiont. Using these constraints in a pFBA  
174 framework, we examined how changes in *Wolbachia* populations affect the maximum  
175 flux through the objective function of the model. As the availability of a carbon source  
176 and of oxygen are two of the most important determinants of the model's activities, we  
177 examined the model under four different nutrient conditions: high oxygen (580 units)  
178 and high glucose (250 units) (HOHG), high oxygen and low glucose (45 units) (HOLG),  
179 low oxygen (90 units) and high glucose (LOHG), and low oxygen and low glucose  
180 (LOLG).

181 By applying these constraints to the otherwise unconstrained model and varying the  
182 relative load of *Wolbachia*, we found that the maximum production of the biomass  
183 objective function occurs at *Wolbachia* weights of 0.04, 0.02, 0.02, and 0.01 under  
184 HOHG, HOLG, LOHG, and LOLG, respectively (**Figure 2**). Under all conditions the  
185 model was infeasible with no *Wolbachia* (which agrees with the experimentally  
186 determined essential role of the endosymbiont), and as the *Wolbachia* weight increased  
187 the objective function peaked rapidly followed by a steady decline. Since the negative  
188 impact to the objective function was minimal until 0.18, we assigned a weight of 0.1  
189 under all nutrient conditions. This was chosen to minimize the impact on the objective  
190 function, while still being conservative in allowing reasonable flux through *Wolbachia*  
191 reactions.

192

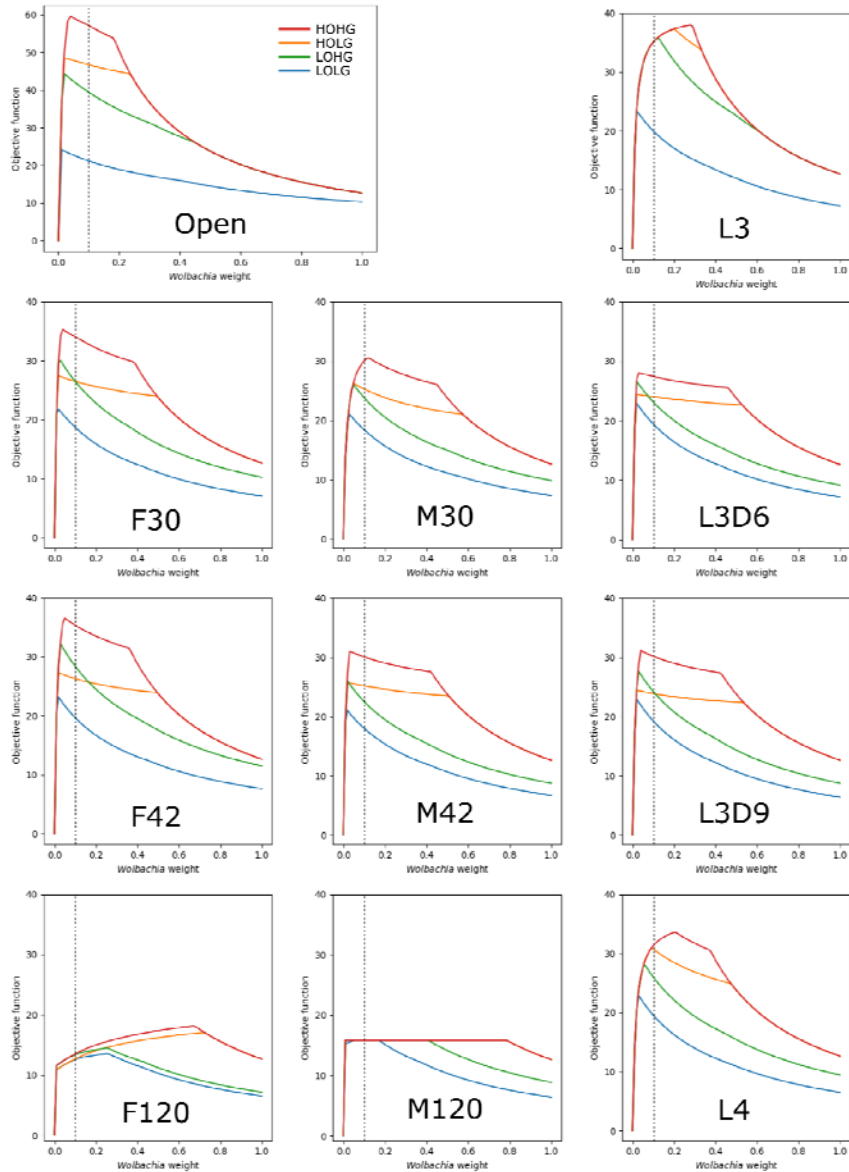

193

194 **Figure 2: The effect of the *Wolbachia* load on the maximum objective function flux**  
195 **under different nutrient conditions and lifecycle stages.** The dashed line indicates  
196 the *Wolbachia* weight of 0.1 used in all subsequent experiments.

197

198 The behavior of the other lifecycle models was relatively similar, except for F120 and  
199 M120, which had by far the least metabolic activity. In all cases the models were more  
200 sensitive to increasing the *Wolbachia* weight under low oxygen than under low glucose

201 conditions, as evidenced by the relative gradients associated with LOHG compared to  
202 HOLG (**Figure 2**).

203

### 204 **Altering nutrient conditions reveals a metabolic landscape rich in alternative** 205 **energy production pathways**

206 Over the course of its lifecycle, *B. malayi* encounters a range of different nutrient  
207 conditions and likely regulates enzyme expression to alter metabolic flux to optimize  
208 growth in each condition. For example, adult worms are found in the lymphatic system  
209 where the expectation is that the parasite is exposed to a substantially lower oxygen  
210 environment compared to other life stages. We therefore performed a series of pFBA  
211 simulations in which we examined the impact of changes in two key metabolites on  
212 worm growth, oxygen and glucose, in the different lifecycle models (**Figure 3**).  
213 Fumarase is one of the measured reactions and is part of the TCA cycle that converts  
214 fumarate into malate. In addition to being located directly downstream of Complex II in  
215 the TCA cycle, it is also directly upstream of the anaerobic reverse Complex II (**Figure**  
216 **4**). Given that fumarase is reversible, flux measurements provide an indication of the  
217 activity of both aerobic and anaerobic metabolism. As expected, pFBA predicts a  
218 reliance on anaerobic pathways under low oxygen conditions (**Figure 3**). However, at  
219 an oxygen concentration of 205 flux units (**Figure 3**, *vertical dashed line*), there is a  
220 switch to the aerobic pathway in the unconstrained and L3 models. Interestingly, the  
221 acetate and propanoate waste transporters are no longer used above this threshold; the  
222 predicted presence of these waste products is consistent with previous studies of  
223 helminth anaerobic metabolism (Tielens *et al.*, 2010; Muller *et al.*, 2012).

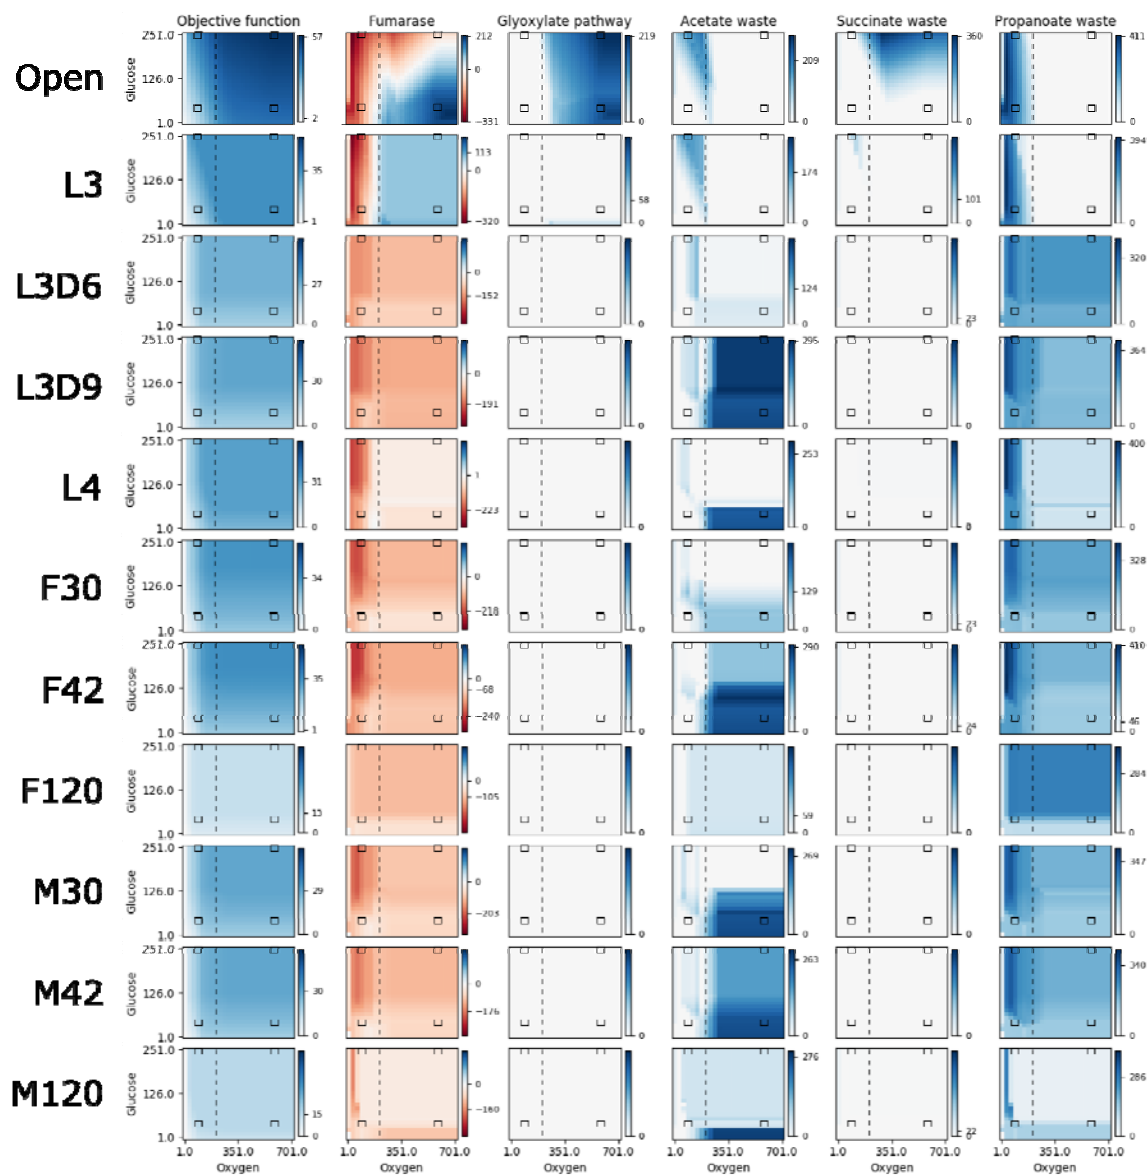

224

225 **Figure 3. Reaction fluxes when varying oxygen and glucose.** The activities of the  
226 objective function and five other reactions are shown for a range of 25 oxygen and 25  
227 glucose availabilities, for each lifecycle model. For each, pFBA was performed for all  
228 625 combinations of oxygen and glucose; the colour of each pixel in the heatmap  
229 indicates the activity of the reaction at that nutrient availability, with white, dark blue, and  
230 dark red indicating no activity, maximum forward, and maximum reverse, respectively.  
231 As each reaction has a different activity profile, each has its own colour legend. The four  
232 black boxes on each graph indicate what we discuss as low and high concentrations of

233 oxygen (90 / 580) and glucose (45 / 250), and the vertical dashed line indicates the  
 234 anaerobic-aerobic threshold at 205 units of oxygen.

235

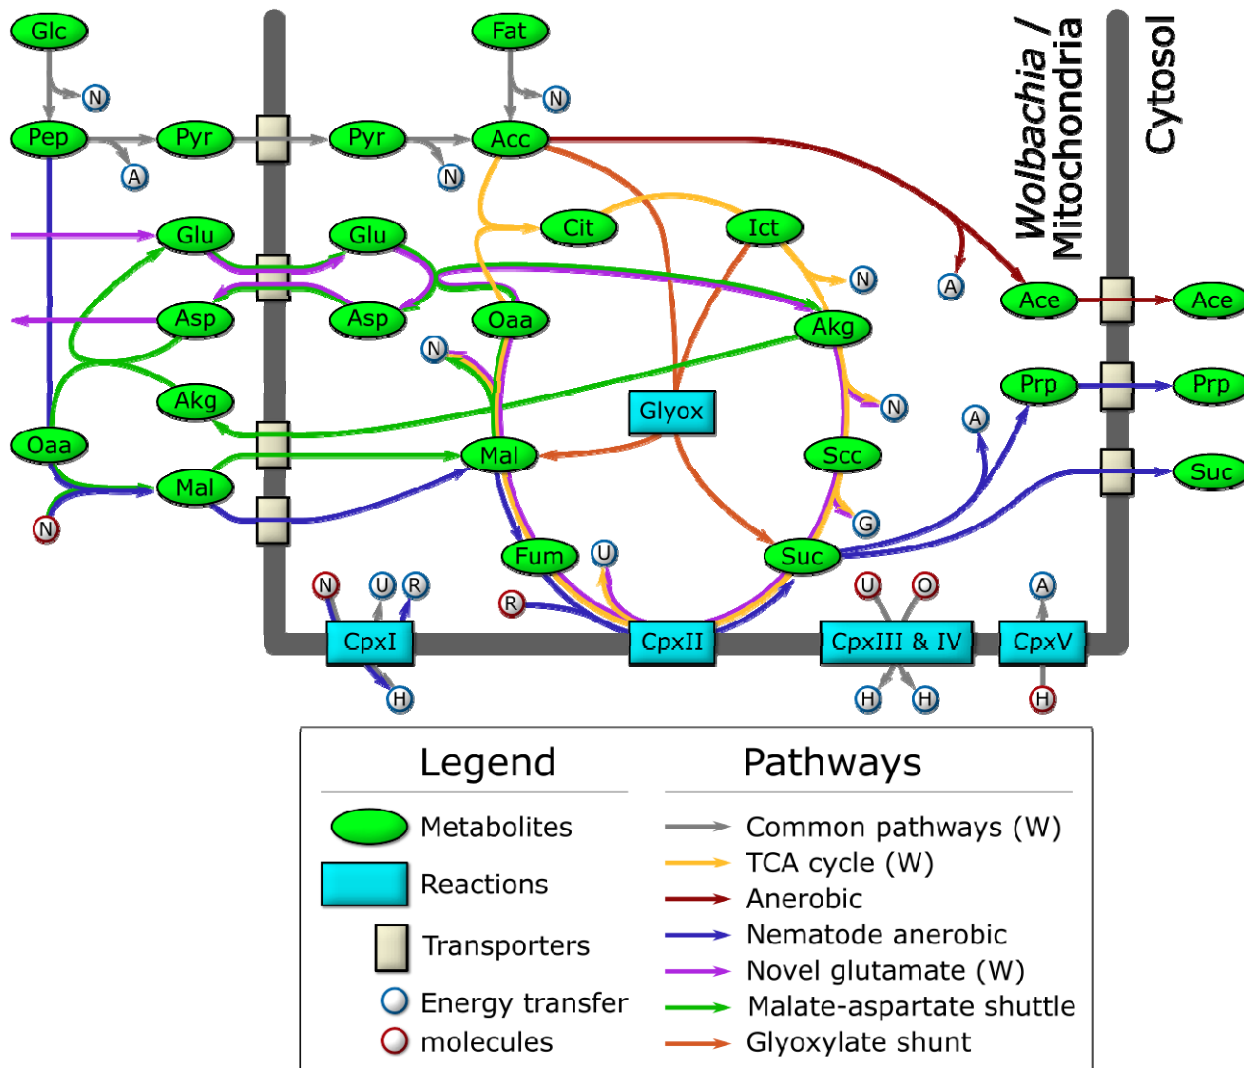

236

237 **Figure 4. Schematic diagram of the major catabolic pathways observed in the**  
 238 **model.** Metabolites were manually tracked in the model under many different nutrient  
 239 conditions and lifecycle expression constraints, and the major catabolic pathways are  
 240 diagrammed here. The thick dark line indicates the mitochondrial / *Wolbachia*  
 241 membrane, and those pathways present in, or feeding into, the *Wolbachia* compartment  
 242 are indicated by (W). The labeled metabolites are Glc: glucose; Pep:  
 243 phosphoenolpyruvate; Pyr: pyruvate; Acc: acetyl-coenzyme A; Fat: fatty acids; Cit:

244 citrate; Ict: isocitrate; Akg: alpha-ketoglutarate; Scc: succinyl-coenzyme A; Suc:  
245 succinate; Fum: fumarate; Mal: malate; Oaa: oxaloacetate; Glu: glutamate; Asp:  
246 aspartate; Ace: acetate; Prp: propanoate. The labeled reactions are CpxI: Complex 1;  
247 CpxII: Complex 2; CpxIII: Complex 3; CpxIV: Complex 4; CpxV: Complex 5; Glyox:  
248 glyoxylate. The energy transfer molecules are common metabolites, where a blue  
249 border indicates that the molecule was produced, and a red border indicates that it was  
250 consumed. The labeled energy transfer molecules are A: ATP; G: GTP; N: NADH; U:  
251 ubiquinol; R: rholoquinol; H: proton-motive force; O: oxygen.

252

253 To further explore the impact of glucose and oxygen availability on *B. malayi*  
254 metabolism, we conducted detailed analyses under the four diverse nutrient conditions  
255 previously described: HOHG, HOLG, LOHG, and LOLG. For each condition, the model  
256 was provided with sufficient fatty acids (50 units), amino acids (100 units), and several  
257 cofactors: ammonia, phosphate, H<sup>+</sup>, adenine, pyridoxal phosphate, heme, folate,  
258 cholesterol, oleic acid, pantothenate, choline, riboflavin, putrescine, nicotinate, UTP,  
259 CTP, Fe<sup>2+</sup>, and N-acetyl-D-glucosamine; in all simulations, the maximum usage of fatty  
260 acids, amino acids, and cofactors was less than was provided.

261 We observe that the model produces the most biomass under HOHG conditions, as  
262 expected. Instead of using the full TCA cycle, the model predicts a reliance on the  
263 glyoxylate shunt to produce malate and succinate (**Figure 4**). A large proportion  
264 (74.6%) of malate is processed by the TCA cycle to isocitrate which is recycled back  
265 into the glyoxylate shunt, and 18.2% is predicted to be processed through anaerobic  
266 pathways to produce succinate, a phenomenon termed the Crabtree effect (Postma *et*  
267 *al.*, 1989; Pfeiffer and Morley, 2014), in which anaerobic pathways are used by the cell  
268 in the presence of high oxygen and glucose. Succinate produced through both  
269 pathways is subsequently exported from the cell as waste. The majority of the oxygen  
270 imported (74.5%) is used to generate ATP through oxidative phosphorylation, while only  
271 6.2% (36 units) is predicted to be used by *Wolbachia*.

272 Under HOLG conditions, growth is predicted to fall to 82% of optimal biomass  
273 production. While the glyoxylate shunt is still used, succinate is no longer exported, but

274 instead is processed by the TCA cycle to produce energy, with CO<sub>2</sub> subsequently  
275 exported as waste. Similar to HOHG, 71.2% of the oxygen is used for oxidative  
276 phosphorylation in the mitochondria, while 6.0% (35 units) is used by *Wolbachia*.

277 Under LOHG conditions, biomass production falls to 69%. Here, the glycolytic pathway  
278 is used to generate energy, with glucose metabolized to phosphoenolpyruvate (PEP)  
279 producing approximately half of the total NADH used by the model, which is then  
280 transported into the mitochondria via the malate-aspartate shuttle. The other half of the  
281 NADH is produced by the classical anaerobic pathway involving the conversion of some  
282 PEP (37.3%) to pyruvate, which is subsequently transported into the mitochondria,  
283 metabolized to acetate, and excreted as waste. However, most of the PEP (59.0%) is  
284 processed by the nematode-specific anaerobic pathway. Through this pathway, PEP is  
285 metabolized into malate and transported to the mitochondria where it is processed to  
286 succinate by the reverse Complex II, and ultimately converted to propanoate and  
287 exported as waste. Under these conditions, most of the oxygen in the model (61.0%) is  
288 used to generate ATP through oxidative phosphorylation, while 37.8% (34 units) is used  
289 by *Wolbachia*.

290 Under LOLG conditions biomass production is reduced to 37% of the optimal. Glucose  
291 is converted to malate and transported into the mitochondria as observed under LOHG  
292 conditions. Approximately half is processed to succinate by the reverse Complex II,  
293 while the other half is used to generate NADH via conversion to oxaloacetate,  $\alpha$ -  
294 ketoglutarate (AKG), succinyl-CoA, and then succinate. All of the succinate is then  
295 converted to propanoate and exported. Under these conditions 69.8% of the oxygen is  
296 being consumed by oxidative phosphorylation, and 29.6% (27 units) is used by  
297 *Wolbachia*.

298 Interestingly, the model predicts a potentially novel form of glutamate metabolism,  
299 representing a combination of the malate-aspartate shuttle and the tricarboxylic acid  
300 (TCA) cycle (**Figure 4**). It is similar to the utilization of malate under LOLG conditions,  
301 except that succinate is recycled by the TCA cycle instead of being exported. In this  
302 pathway, glutamate is first transported into the mitochondria in exchange for aspartate,  
303 before combining with oxaloacetate to yield AKG and aspartate. AKG is then processed

304 by the TCA cycle to regenerate oxaloacetate. The net reaction results in the conversion  
305 of glutamate to aspartate and CO<sub>2</sub>, along with the production of key energy metabolites:  
306 GTP, 2 x NADH, and ubiquinone. This is almost equivalent to the energy produced by  
307 the catabolism of a single molecule of acetyl CoA by the TCA cycle: 2 x CO<sub>2</sub>, GTP, 3 x  
308 NADH, and ubiquinone. However, given that the glutamate/aspartate transporter is  
309 driven by the proton-motive force, which is not specifically modeled by pFBA, it is not  
310 known if this pathway would be energetically favourable *in vivo* (Bremer and Davis,  
311 1975; Bakker *et al.*, 2001) and so may therefore not be physiologically relevant.

312 It has previously been suggested that *Wolbachia* may function to supplement  
313 mitochondrial energy production in filarial nematodes (Darby *et al.*, 2012); our model  
314 predictions support this hypothesis. Under LOLG conditions, *Wolbachia* is predicted to  
315 export the maximum amount of ATP possible (100 units) into the *B. malayi* cytosol. It  
316 was also suggested that *Wolbachia* uses pyruvate as its primary carbon source  
317 (Voronin *et al.*, 2016), but under LOLG conditions pyruvate import is nearly zero, and  
318 *Wolbachia* is using the novel glutamate metabolic pathway described above. Under  
319 LOHG conditions, *Wolbachia* ATP export drops to 90% compared to LOLG conditions.  
320 Pyruvate import increases substantially (9 units instead of 1), and the model uses both  
321 the TCA cycle and the glutamate metabolic pathway to generate energy. The *Wolbachia*  
322 metabolic pathways appear much the same under the other conditions, except that ATP  
323 export drops to 71%, and 44% of LOLG for HOLG and HOHG, respectively.

324

### 325 **Lifecycle stage specific metabolic models of *B. malayi* reveal a dynamic reliance** 326 **on alternative pathways**

327 To determine how metabolic pathway dependencies may vary across the *B. malayi* life  
328 cycle, pFBA was performed under the four different nutrient conditions for each of the  
329 ten lifecycle stages (**Figure 5**). As expected, the models produced the most biomass  
330 under HOHG conditions, and the unconstrained (open) model produced the most under  
331 all conditions. In general, models are able to produce more biomass when presented  
332 with additional nutrients, which is why biomass production increases when moving from  
333 low glucose to high glucose, under both low and high oxygen conditions (LOLG to



334 LOHG or HOLG to HOHG). There was little difference in model performance under  
335 LOLG conditions, except for adult worms at 120 dpi (M120 and F120). This indicates  
336 that the different reaction constraints are playing a minor role in this scenario, and that  
337 the concentrations of glucose and oxygen are the limiting factors for adult worms.

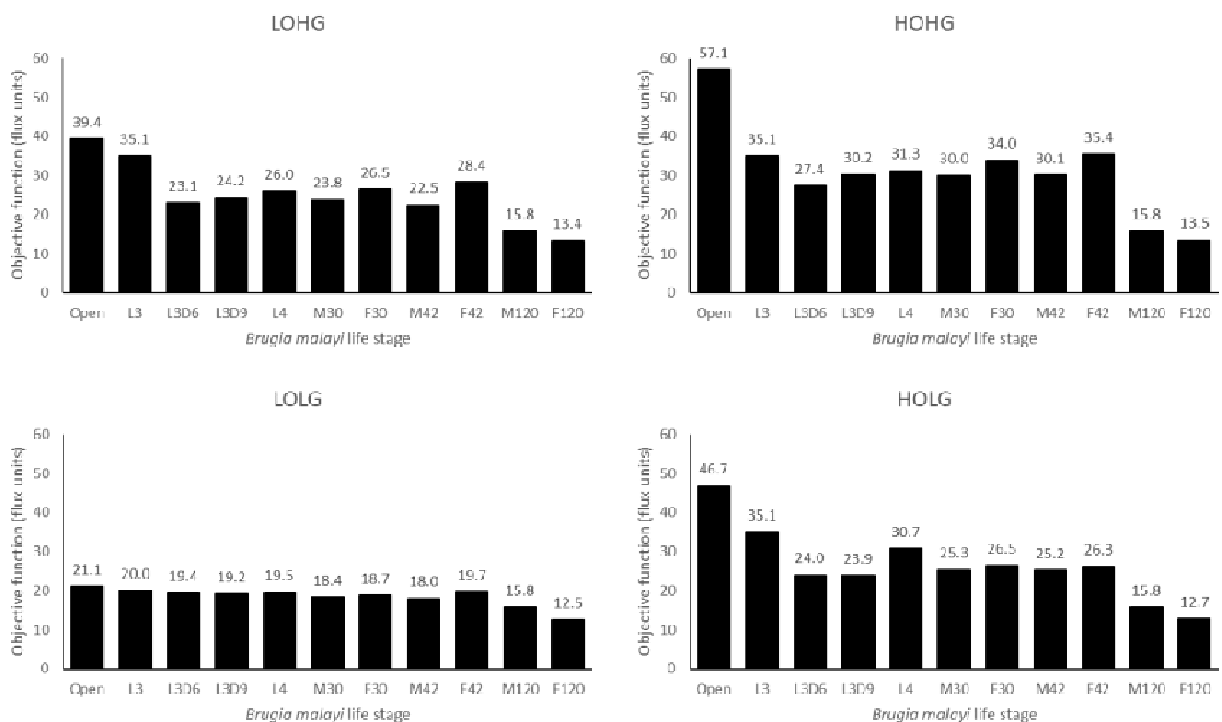

338  
339 **Figure 5. Biomass production across lifecycle stages under different nutrient**  
340 **conditions.** The maximum biomass produced by each model under LOLG, LOHG,  
341 HOLG, and HOHG conditions.

342  
343 While the L3 model experiences a large benefit from LOHG or HOLG compared to  
344 LOLG, there is no increased benefit under HOHG conditions. This indicates that the  
345 reaction constraints imposed for this stage limit the model's ability to exploit increases in  
346 these metabolites. Similarly, the M120 model also appears saturated for these  
347 metabolites, even under LOLG conditions, while the F120 model receives only a modest  
348 benefit from additional glucose or oxygen.

349 Besides measuring the biomass production for each model under different nutrient  
 350 conditions, we also quantified the number of reactions used by the models (**Figure 6**).  
 351 We found that the *Wolbachia* compartment changes the least among the different  
 352 models and conditions, while the mitochondrial compartment shows the most variation.  
 353 This also allows us to identify “enzymatically constrained” models, which is a term that  
 354 relates to the number of possible ways a model is able to achieve its maximum  
 355 objective flux; if there are multiple alternate metabolic pathways that can be used to  
 356 satisfy the objective function, a model would be considered enzymatically  
 357 unconstrained. Models generally become less constrained as they are provided with  
 358 more nutrients.

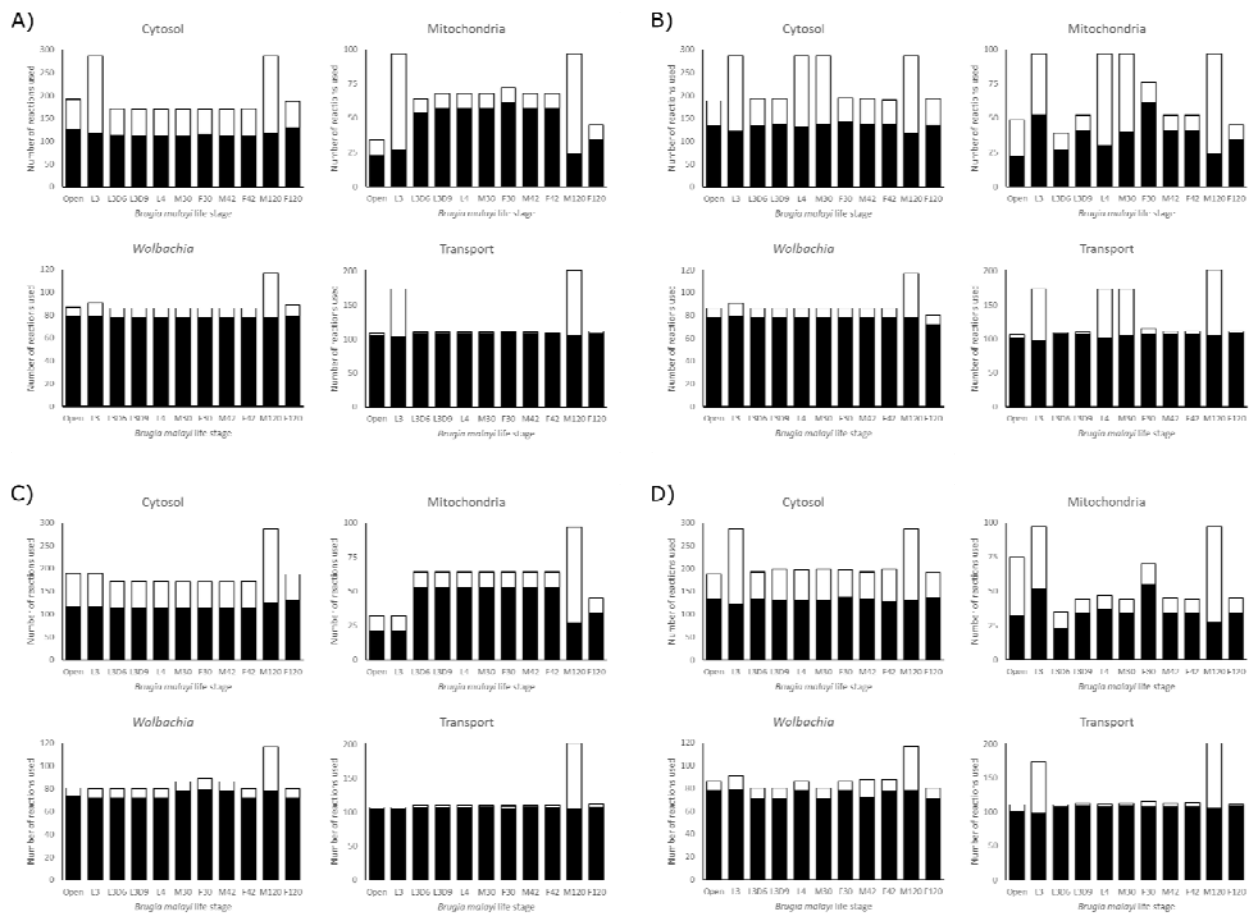

359

360 **Figure 6. Reaction utilization across lifecycle stages.** The number of reactions used  
 361 by each model in each compartment to achieve its maximum objective function flux,  
 362 under A) LOHG, B) HOHG, C) LOLG, and D) HOLG conditions. The black bars indicate

363 the number of reactions used in the most parsimonious solution, while the stacked white  
364 bars indicate the number of reactions used in all possible solutions that yield the same  
365 value for the objective function. The larger the height discrepancy between the two bars,  
366 the more redundant pathways the model has to achieve the same objective function  
367 flux.

368

369 It is interesting to note that both the L3D6 and L3D9 models appear to be substantially  
370 more enzymatically constrained than L3. These two models represent the time when *B.*  
371 *malayi* is molting, specifically during the apolysis stage of molting where a new cuticle is  
372 being synthesized to replace the old cuticle. These reduced usage numbers, combined  
373 with reduced biomass production (**Figure 5**), may reflect this specialized function and  
374 large energetic expenditure. Differences between these related models extend to  
375 pathway utilization as well. Under HOHG conditions, the L3 model uses the whole TCA  
376 cycle—though fatty acids are used as the sole carbon source instead of glucose—while  
377 the other two models exhibit the apparent Crabtree effect. Unlike the unconstrained  
378 model, none of these three larval-stage models export any significant amount of  
379 succinate. Additional differences include L3D9 exporting a large quantity of acetate, and  
380 L3D6 and L3D9 exporting propanoate.

381

### 382 **Metabolomics data identify intermediates throughout, but lowest in L3**

383 To help validate our reconstruction, we performed untargeted metabolomics on worm  
384 extracts from four different lifecycle stages. Applying two complementary approaches,  
385 our analyses identified 146 unique metabolites from a ‘hybrid’ analysis and 492 from a  
386 ‘predictive’ analysis (see Supplementary information for details); of these, 103 and 316  
387 metabolites were found in at least three samples, respectively. Directly relating these  
388 data to the model predictions is unfortunately non-trivial, as the metabolomics analyses  
389 detect the size of the pool of some metabolite at one point in time, while our pFBA  
390 predictions are steady-state rates.

391 Most of the TCA cycle intermediates (**Figure 4**) were detected in one or both of our  
392 metabolomics data sets. Phosphoenolpyruvate was only detected in adults in the hybrid  
393 analysis but was found in the microfilaria and L3 stages as well as in the predicted  
394 analysis. Pyruvate was detected only in the adult worms in the hybrid analysis, and at  
395 the highest levels in males. Oxaloacetate was detected in all stages in the predicted  
396 analysis, but at the lowest levels in the adults. Citrate and isocitrate were detected in the  
397 adults and one microfilaria sample in the predicted analysis, and only in the adults in the  
398 hybrid analysis. Alpha-ketoglutarate was detected in both analyses in the adults and  
399 one microfilaria sample, highest in the females. Succinate, fumarate, and malate were  
400 detected in the adults and microfilaria, with none in the L3 samples. This pattern was  
401 consistent in both analyses, except for succinate which was missing from the hybrid  
402 analysis. No acetyl-CoA or succinyl-CoA were detected in either analysis.

403 We were able to detect several fatty acid degradation intermediates as well, in particular  
404 carnitine-conjugated fatty acids. Carnitine and acetylcarnitine were detected in all  
405 samples in both analyses and were found to be highest in males, followed by females,  
406 microfilaria, and finally L3. Other short-chain acylcarnitines, butyrylcarnitine and  
407 valerylcarnitine were detected in all samples except L3 in the hybrid analysis.  
408 Consistent with above, these metabolites were found to be highest in males, followed by  
409 females, and then microfilaria. Propionylcarnitine was detected only in the adult  
410 samples in the hybrid analysis. The only long-chain fatty acid intermediate detected was  
411 palmitoylcarnitine, and only in the microfilaria and one male sample in the predicted  
412 analysis.

413 If we accept that higher levels of these intermediates imply increased metabolic activity,  
414 then we observe a general trend of the highest activity in the adults (in particular males  
415 metabolizing fatty acids), followed by the microfilaria, with L3 having the lowest levels if  
416 any were detected. This fits with the observation that L3 is a non-feeding stage, which  
417 has been likened to the dauer stage of *C. elegans* (Li *et al.*, 2009).

418

419 **Modeling of *B. malayi* metabolism predicts novel therapeutic targets**

420 To identify critical reactions in the metabolic network that represent potential therapeutic  
421 targets, we performed a series of *in silico* knockouts in which each reaction constraint  
422 was set to zero (i.e. no flux was allowed through that reaction). Of the 1,011 enzymatic  
423 reactions in *iDC625*, 815 had no impact on the biomass objective function when  
424 knocked out (**Figure 1B**); 69 were found to have a low impact ( $100\% > \text{biomass} > 90\%$   
425 of original), 28 had a medium impact ( $90\% \geq \text{biomass} > 0\%$ ), and 99 were found to be  
426 essential ( $\text{biomass} = 0\%$ ). The biomass breakpoints for no impact and essential were  
427 actually set to within 0.0001 flux units ( $< 0.0002\%$  of the biomass) of the true values to  
428 account for floating point errors.

429 This set of essential genes was compared to those predicted in the *iCEL1273 C.*  
430 *elegans* model, as well as experimentally determined essential reactions (Safak Yilmaz  
431 and Walhout, 2016). The authors used a more liberal definition of essential reactions,  
432 selecting all of those that reduced the model's biomass by 50% or more. They predicted  
433 159 essential genes, corresponding to 125 KEGG reactions, 56 of which are also found  
434 in *iDC625*; of the 99 reactions we predict to be essential, 67 were found in the  
435 *iCEL1273* model. They also list 461 *C. elegans* genes that have been experimentally  
436 determined to be essential; these correspond to 425 KEGG reactions, 246 of which are  
437 also found in *iDC625*. There were only 11 essential reactions shared by *iCEL1273* and  
438 *iDC625* (**Figure 1C**), but this low overlap is likely because both models are missing  
439 many true essential reactions. This is suggested by the large overlap between each  
440 model's predictions and the experimentally determined essential reactions; even though  
441 they are evolutionarily distinct species, 69% of the predicted *iDC625* essential reactions  
442 overlap with the experimentally determined essential reactions of *C. elegans*.

443 In addition to single reactions, we also investigated reaction pairs exhibiting synthetic  
444 lethal relationships. Such relationships may exist, for example, when two reactions  
445 operate in alternative pathways that can each lead to production of the same key  
446 metabolite. This 'two hit' strategy may offer greater long-term potential through the  
447 development of combination therapies that ultimately reduce the risk of emergence of  
448 resistance, both through requiring the pathogen to simultaneously acquire resistance to  
449 two independent targets, and through the use of lower drug dosages that can result

450 from increased efficacy (Lehár *et al.*, 2009; Ejim *et al.*, 2011; Spitzer *et al.*, 2011; Aziz *et al.*, 2015).

452 Of the 909 reactions which were predicted to inhibit growth by less than 50% when  
 453 knocked out individually, 129 were involved in at least one pair of knockouts that  
 454 together reduced biomass production to less than 50% (**Figure 7**). Analyses reveal that  
 455 the model possesses alternative pathways to produce nicotinate—important in redox  
 456 reactions—and that knocking out different combinations of these pathways had a  
 457 dramatic impact on biomass production (**Figure 7**; P1, P2, P3, and P11). Our  
 458 simulations also predict that the loss of one half of the TCA cycle or the other can be  
 459 compensated for by the model, but not both, and only if the *Wolbachia* TCA cycle is  
 460 functional (**Figure 7**; P4, P5, P6, and P15). While purine biosynthesis pathways are  
 461 predicted to be essential by our *in silico* single knockouts, pyrimidine biosynthesis  
 462 pathways are only predicted as essential through synthetic lethal interactions,  
 463 suggesting redundancy in these pathways (**Figure 7**; P7, P8, P9, and P10). Finally, we  
 464 saw evidence of some redundancy in the *B. malayi* pentose phosphate pathways  
 465 (**Figure 7**; P12 and P13), and observed an interesting nearly lethal interaction between  
 466 part of the pentose phosphate pathway involved in the metabolism of fructose 6-  
 467 phosphate and the mitochondrial oxidative phosphorylation reactions (**Figure 7**; P14  
 468 and P16).

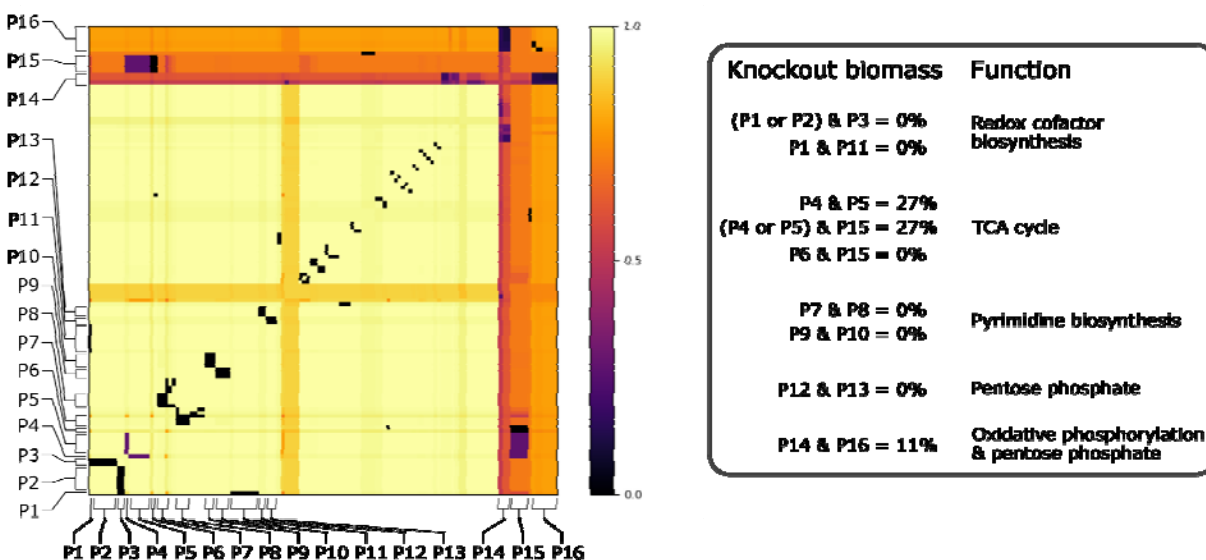

470 **Figure 7. Effects of all double knockouts in the model.** This heatmap shows the  
471 effect of double knockout combinations of 129 reactions that reduced biomass  
472 production below 50%. A value of 1.0 (light yellow) indicates that there was no effect  
473 from the knockout, while a value of 0.0 (black) indicates that the model was unable to  
474 produce any biomass. Pathways are defined as containing one or more reactions, and  
475 16 of the major pathways are labeled on the heatmap. The legend on the right  
476 describes the interactions observed between the pathways.

477

### 478 **Fosmidomycin, MDL-29951, and Tenofovir possess antifilarial activity**

479 To validate the performance of our model, we selected a subset of reactions for  
480 targeted inhibition using known drugs. Of the 99 reactions predicted to be essential, 77  
481 were associated with one or more genes (33 in the cytosol, 41 in *Wolbachia*, and 3 in  
482 the mitochondria). This subset was chosen because they were considered less likely to  
483 be model artifacts. Reactions were prioritized by considering their expression across  
484 different lifecycle stages, the number and availability of existing inhibitors identified in  
485 the ChEMBL database (Gaulton *et al.*, 2012; Davies *et al.*, 2015; Gaulton *et al.*, 2017),  
486 and the similarity to human homologs. From this prioritized list we selected three  
487 inhibitors to validate our predictions through *in vitro* assays (see **Table 1** for details).

| Drug         | Predicted target pathway          | Developed for           | Concentration (µM) |
|--------------|-----------------------------------|-------------------------|--------------------|
| Fosmidomycin | Isoprenoid precursor biosynthesis | Antibiotic/antimalarial | 12.5               |
| MDL-29951    | Gluconeogenesis                   | Epilepsy                | 12.5               |
| Tenofovir    | Purine metabolism                 | Hepatitis B             | 12.5               |

488 **Table 1.** Details about the three drugs tested for anti-filarial activity against *B. malayi*  
489 adult worms.

490

491 As mentioned above, reactions were only prioritized as potential targets if their cognate  
492 genes were expressed across the *B. malayi* lifecycle stages (**Table 2**). The predicted  
493 Fosmidomycin target, *Wolbachia* gene Wbm0179 (1-deoxy-D-xylulose 5-phosphate  
494 reductoisomerase) has moderate expression that is consistent across most stages, high  
495 in early adult males but dropping off over time. The target gene of MDL-29951,  
496 Bm13850 (fructose biphosphatase), has moderate expression that is highest in L3 but  
497 relatively consistent across stages. *Wolbachia* also has a homolog of this gene,  
498 Wbm0158, that is expressed at a higher level especially in the late adult stages.  
499 Tenofovir was identified as a ChEMBL hit of *B. malayi* Bm9070 (an adenylate kinase),  
500 which has very low expression in most stages, but moderate in adult males. There is a  
501 *Wolbachia* homolog of this gene as well, Wbm0321, with low expression throughout the  
502 life stages. There are two other *B. malayi* genes that are associated with this reaction:  
503 Bm3965 (a UMP-CMP kinase) has moderate expression, highest in adult females but  
504 quite consistent across stages; and Bm14014 (adenylate kinase isoenzyme 1) has very  
505 high expression, highest in L3 but still high in male and female adults.

|                      | Target gene | Life stage expression (FPKM) |      |      |     |     |     |      |     |     |      |
|----------------------|-------------|------------------------------|------|------|-----|-----|-----|------|-----|-----|------|
|                      |             | L3                           | L3D6 | L3D9 | L4  | F30 | F42 | F120 | M30 | M42 | M120 |
| Fosmidomycin         | Wbm0179     | 12                           | 17   | 18   | 11  | 27  | 11  | 16   | 37  | 31  | 3    |
| MDL-29951            | Bm13850     | 45                           | 21   | 22   | 30  | 22  | 24  | 6    | 31  | 17  | 14   |
|                      | Wbm0158     | 68                           | 66   | 69   | 49  | 27  | 40  | 80   | 29  | 40  | 95   |
| Tenofovir            | Bm9070      | 0                            | 0    | 0    | 0   | 0   | 1   | 1    | 1   | 4   | 26   |
|                      | Wbm0321     | 34                           | 13   | 14   | 4   | 5   | 3   | 15   | 0   | 18  | 6    |
| Tenofovir-associated | Bm3965      | 18                           | 19   | 20   | 11  | 57  | 33  | 14   | 15  | 19  | 17   |
|                      | Bm14014     | 419                          | 101  | 119  | 105 | 76  | 93  | 21   | 75  | 49  | 32   |

506 **Table 2.** Expression of the predicted drug target genes across *B. malayi* life stages.

507

508 These three predicted drug targets were subsequently validated by testing their effects  
509 on worms *in vitro*. Fosmidomycin, MDL-29951, and Tenofovir were found to reduce the  
510 number of *Wolbachia* per worm by 47% ( $p < 0.05$ ), 76% ( $p < 0.001$ ), and 70% ( $p <$   
511 0.001), respectively (**Figure 8**). We also observed two of the drugs impacting fecundity,



512 with Fosmidomycin and Tenofovir reducing the number of microfilariae produced per  
513 worm by 33% ( $p < 0.01$ ) and 34% ( $p < 0.05$ ), respectively. Fosmidomycin treatment also  
514 appeared to lead to a consistent phenotype affecting motility, but this was not efficiently  
515 detected with the Worminator assay (data not shown).

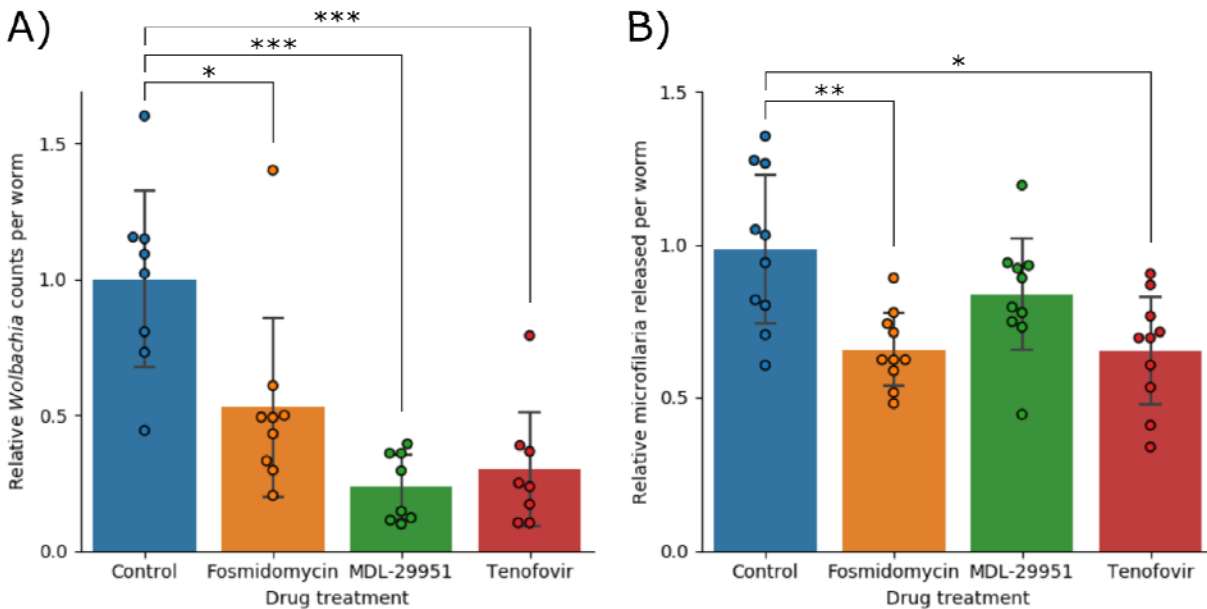

516

517 **Figure 8. Potential anthelmintic activity against adult *B. malayi* worms.** A) shows  
518 the number of *Wolbachia* detected per worm, normalized against the control group and  
519 B) shows the number of microfilariae released per worm, normalized against the control  
520 group. In both data sets significance was detected using a single factor ANOVA,  
521 followed by 2-tailed t-tests between each drug and the control with a Bonferroni  
522 correction. Error bars indicate the standard deviations; \* indicates  $p < 0.05$ ; \*\* indicates  
523  $p < 0.01$ ; \*\*\* indicates  $p < 0.001$ .

524

525

## 526 DISCUSSION

527 We present the first constraints based metabolic model for *B. malayi*, which we term  
528 *DC625*. While the model captures many known features of nematode metabolism,  
529 simulations under a variety of different conditions yielded a number of emergent  
530 behaviours, including switching between aerobic and anaerobic metabolic pathways, a  
531 predicted Crabtree effect under high oxygen and glucose, and a novel pathway that  
532 relies on the catabolism of glutamate to aspartate to generate energy. This suggests  
533 that in addition to being robust, the model is capable of generating novel biological  
534 hypotheses.

535 A high quality compartmentalized metabolic model allows us to study the metabolic  
536 processes of the cell in detail, including pathways that have been poorly studied in the  
537 past; in particular, the anaerobic metabolic pathways used by parasitic nematodes are  
538 unlike those studied in most other eukaryotes (Del Borrello *et al.*, 2019). Our model is  
539 the first to incorporate this pathway and is therefore likely to yield accurate predictions  
540 as low oxygen environments are biologically relevant for parasitic nematodes.

541 An emergent behaviour predicted by the model was the exhibition of the Crabtree effect,  
542 a previously described phenomenon observed in yeast where anaerobic fermentation  
543 pathways are activated in aerobic conditions, but only in the presence of high levels of  
544 glucose (Postma *et al.*, 1989; Pfeiffer and Morley, 2014). It is interesting to note that  
545 succinate export flux mirrors the activity pattern of fumarase (**Figure 3**), potentially  
546 indicating that the Crabtree effect occurs only under conditions that result in succinate  
547 export. This suggests further investigation of this effect, perhaps through *in vitro* studies  
548 of worms exposed to different oxygen and glucose concentrations.

549 The glyoxylate pathway is primarily discussed in the literature as a way for plants to  
550 process fatty acids into glucose and starches, but it is also found in fungi, some protists,  
551 and bacteria (Kondrashov *et al.*, 2006). The relevant genes have been detected in  
552 several Metazoan species, but the nematodes are the only group where the pathway is  
553 widely accepted to be functional, and where it is regarded as a conduit from fatty acids  
554 to glucose during embryogenesis. It involves many of the same enzymes as the TCA  
555 cycle but includes a “shortcut” from isocitrate to succinate and malate. It has been

556 suggested that this pathway may also play a role in energy metabolism (Butler *et al.*,  
557 2012)—in particular when metabolizing fatty acids—and our results appear to support  
558 that this hypothesis is plausible.

559 Besides predicting the use of metabolic pathways, our model has the ability to identify  
560 reactions essential to growth as potential therapeutic targets. Previous predictions of  
561 essentiality based on a compartmentalized model of *C. elegans* metabolism, iCEL1273,  
562 were broadly consistent with *in vitro* gene essentiality screens (Safak Yilmaz and  
563 Walhout, 2016), suggesting the process by which we made our predictions is likely to be  
564 biologically relevant.

565 Two of the highly prioritized drug target hits identified in our study were aldolase  
566 isozymes *aldo-1* (Bm5580) and *aldo-2* (Bm3135). Knocking out the cognate reactions  
567 led to unrecoverable states in the model, both genes have several druggable homologs  
568 in ChEMBL, and the expression of both genes was consistent across the adult lifecycle  
569 stages (*aldo-1* had the highest stage-specific expression out of any of the prioritized  
570 genes). These were not pursued in this work, as in a previous study we examined the  
571 effects of knocking down these genes with RNAi in adult female *B. malayi* (Voronin *et*  
572 *al.*, 2016). While the knockdown of *aldo-1* had no significant effects, that of *aldo-2*  
573 showed effects including a decrease in the *Wolbachia* population, a reduction in  
574 fecundity of female worms, and an increase in apoptotic embryos. This shows that our  
575 model is capable of predicting viable targets in the adult worms.

576 We validated our predictions of essential reactions by observing the effects of three  
577 existing drugs on *B. malayi* adults. Fosmidomycin was originally investigated as an  
578 antibiotic in the 1980s, but more recently has been studied as an anti-malarial drug  
579 (Umeda *et al.*, 2011; Jomaa *et al.*, 1999; Armstrong *et al.*, 2015). It acts on the non-  
580 mevalonate isoprenoid biosynthesis pathway, which is generally only found in some  
581 bacteria and plants, in addition to the apicoplast of *Plasmodium falciparum*. This helps  
582 to contribute to the drug's excellent safety profile. Tenofovir is currently licensed by the  
583 FDA for treatment of HIV and Hepatitis B (Agarwal *et al.*, 2015). It is used as a  
584 nucleoside reverse transcriptase inhibitor, and its action against *B. malayi* may work by  
585 a similar mechanism, by competitive inhibition with AMP of adenylate kinase. MDL-

586 29951 was identified as an inhibitor of fructose 1,6-bisphosphatase as a potential  
587 treatment for diabetes (Wright *et al.*, 2003). Interestingly, this enzyme has recently and  
588 independently been proposed as a drug target against *Leishmania* species (Yuan *et al.*,  
589 2017). That study also solved several crystal structures of the enzyme, which would  
590 prove valuable for future refinements of the drug. There have also been several other  
591 inhibitors generated and tested against this enzyme from different species, which could  
592 provide a rich starting point for future work to refine the antiparasitic activity (Dang *et al.*,  
593 2009, 2010; Tsukada *et al.*, 2010; Kaur *et al.*, 2017). Both Tenofovir and MDL-29951  
594 were expected to act against *B. malayi*, but primarily resulted in a significant reduction  
595 of *Wolbachia* populations when tested. The mechanism of action of these drugs against  
596 the endosymbiont is unclear, but *Wolbachia* does possess a homolog of both drug  
597 targets—(Wbm0321 (adenylate kinase) for Tenofovir; Wbm0158 (fructose-1,6-  
598 biphosphatase) for MDL-29951)—that the drugs may be acting against.

599 All three of the drugs tested in this study appear to possess activity against adult *B.*  
600 *malayi* worms, via reduction in *Wolbachia* populations and/or microfilaria production.  
601 The successful validation of these effects suggests that our metabolic model is a useful  
602 approximation of the worm. Further research on this model may therefore yield even  
603 more therapeutic targets.

604

## 605 MATERIALS AND METHODS

606

### 607 **Metabolic reconstruction and flux balance analyses**

608 An initial metabolic reconstruction was generated as described in (Cotton *et al.*, 2016).  
609 Briefly, sets of metabolic enzymes were identified from the *B. malayi* gene models using  
610 DETECT V2 (Hung *et al.*, 2010), BLASTP (Camacho *et al.*, 2009) searches against  
611 enzymes curated in the SWISSPROT database (Bateman *et al.*, 2015), PRIAM  
612 (Claudel-Renard *et al.*, 2003), EFICAz (Tian *et al.*, 2004), and the BRENDA database  
613 (Schomburg *et al.*, 2002). Assignment of metabolic pathways and gap-filling in the  
614 reconstruction were performed by Pathway Tools (Karp *et al.*, 2016).

615 All network analysis methods, including FBA, were performed using the cobrapy  
616 package version 0.5.10 (Ebrahim *et al.*, 2013), which is a Python-based implementation  
617 of the popular COBRA toolbox of FBA-associated methods (Schellenberger *et al.*,  
618 2011). One drawback of FBA is that there are usually many different sets of reaction  
619 fluxes that can lead to the same solution, with no accepted way to choose the most  
620 biologically relevant. Parsimonious FBA (pFBA) is a permutation of this algorithm that  
621 first maximizes the objective function, and then identifies the solution with the smallest  
622 sum over all reaction fluxes. This is predicted to yield more biologically relevant  
623 solutions, and helps to ensure that analyses of the model under different conditions are  
624 likely to yield comparable sets of reaction fluxes.

625

### 626 **Generation of transcriptomic data for the *Wolbachia* endosymbiont during** 627 **molting**

628 Previously published transcriptome data was used for this study, with the exception of  
629 the *Wolbachia* transcriptome during the molting of the worm from L3, L3 day 6, and L3  
630 day 9. These data were generated as described in (Grote *et al.*, 2019). In brief, all *B.*  
631 *malayi* worms were obtained from FR3 (Filariasis Research Reagent Resource Center;  
632 BEI Resources, Manassas, VA, USA). Infective third-stage larvae (iL3) were recovered

633 from mosquitoes (*Aedes aegypti*) and mammalian stage larvae were recovered from  
634 gerbils (*Meriones unguiculatus*) at 6 and 9 days post infection (dpi). Total RNA was  
635 prepared from *B. malayi* worms and *Wolbachia* as previously described (Grote *et al.*,  
636 2017). RNA was prepared from 3 biological replicates of infective L3 (iL3; 2000 larvae  
637 each), 3 replicates of 6 dpi larvae (1500 each) and 2 replicates of 9 dpi larvae (1300  
638 each). Libraries were prepared using the NEBNext Ultra II RNA Library Prep Kit for  
639 Illumina (New England Biolabs) according to manufacturer instructions. Libraries were  
640 sequenced at NYU's GenCore on the Illumina NextSeq500 platform with 150bp paired-  
641 end reads. Sequence reads from each sample were analyzed with the Tuxedo suite of  
642 tools (Trapnell *et al.*, 2010, 2013; Kim *et al.*, 2013). Reads were mapped with Tophat2's  
643 Bowtie2-very-sensitive algorithm to the genome assembly of *Wolbachia* of *B. malayi*  
644 (Foster *et al.*, 2005). Each biological replicate received an average of 1.3 million reads  
645 that mapped to the *Wolbachia* genome. The resulting BAM files were then used with  
646 HtSeq to obtain raw read counts. Differential gene expression analysis was performed  
647 using EdgeR (Robinson *et al.*, 2010). Data was combined with previously published  
648 stages 16 dpi (L4), and male and female worms at 30, 42 and 120 dpi (Grote *et al.*,  
649 2017).

650

## 651 **Generation of lifecycle stage specific metabolic models**

652 To understand how metabolic pathway dependencies may vary across the *B. malayi*  
653 lifecycle, we integrated new and existing stage-specific RNA-Seq datasets to generate  
654 lifecycle stage specific metabolic models. Of the 849 enzymatic reactions in the model  
655 with gene evidence, 837 had stage-specific expression data, allowing constraints to be  
656 placed on their associated metabolic flux. RNA-Seq enzyme expression was used to  
657 apply constraints on reaction flux as we have done previously (Song *et al.*, 2013). In  
658 brief, the expression of each gene was normalized across lifecycle stages, and the  
659 relative expression for each stage was applied to the upper and lower bounds of all  
660 associated reactions. For example, if the expression of a gene in one particular lifecycle  
661 stage was measured to be 30% of its maximum across all stages, the corresponding  
662 lower and upper reaction bounds for that life stage model would be set to (0, 300) or (-

663 300, 300) in arbitrary flux units, for irreversible and reversible reactions, respectively;  
664 the default bounds are (0, 1000) or (-1000, 1000) for irreversible and reversible  
665 reactions, respectively. As we cannot determine whether a measured expression of  
666 zero indicates no expression or that the transcripts were simply not sequenced, all  
667 reactions with a measured expression of zero were left unconstrained in the model. This  
668 yielded 11 distinct metabolic models: open or unconstrained (i.e. without any expression  
669 constraints), L3, L3D6, L3D9, L4, F30, F42, F120, M30, M42, and M120; where L3D6  
670 indicates worms in the 3<sup>rd</sup> larval stage 6 days post-infection, and F30 and M30 indicate  
671 adult female and male worms 30 days post-infection, respectively.

672

### 673 **Metabolomics sample preparation and run**

674 All parasites were obtained from FR3 (Filariasis Research Reagent Resource Center;  
675 BEI Resources, Manassas, VA, USA) where they were isolated and separated by sex  
676 from infected gerbils (*Meriones unguiculatus*) or mosquitoes (*Aedes aegypti*). Worms  
677 were flash-frozen and shipped to the New York Blood Center for processing. Stages  
678 used for metabolomics analysis included L3 larvae from mosquitoes, adult male and  
679 female worms at 120dpi, and microfilaria. The number of worms per sample were 20  
680 adult female worms, 40 adult males, 2X10<sup>6</sup> microfilariae, and 200 L3 larvae per  
681 biological replicate. Samples were washed in 1x PBS and run in triplicate. Adult male  
682 and female worms were picked individually from PBS and each biological was weighed.  
683 The microfilaria and L3 samples were spun down, the PBS pipetted off, and weighed  
684 directly into a metabolomics 2mL screw cap vial with total amounts ranging from 1.3 mg  
685 (adult males) to 15.8 mg (microfilaria). Metabolites were extracted and the data  
686 analyzed as described in the Supplementary Information.

687

### 688 **Validation of drug targets**

689 For validation, 15 adult female and 15 adult male worms (120 dpi) were cultured *in vitro*  
690 for each drug treatment or control group. Worms were cultured for six days in a 12-well  
691 plate with 2 worms per well, in complete culture medium (RPMI-1640 supplemented

692 with 10% FBS, 100 U/mL penicillin, 100 mg/mL streptomycin, 2 mM L-glutamine) at  
693 37°C under 5% CO<sub>2</sub>. Three drugs were assayed: Fosmidomycin, MDL-29951, and  
694 Tenofovir, each at a concentration of 12 µM. Media was changed every other day.

695 Microfilarial release by female worms was determined by quantifying the number  
696 present in the media on the 6<sup>th</sup> day of treatment and collection of adult worms. Two  
697 technical replicates and 10 biological replicates were used to determine microfilaria  
698 production. Significance was determined by a single factor ANOVA, followed by t-tests  
699 between each treatment group and the control using a Bonferroni correction.

700 To analyze the number of *Wolbachia* per worm, DNA was extracted from adult male  
701 worms using the QIAmp DNA Mini Kit (QIAGEN) according to the manufacturer's  
702 protocol. *Wolbachia* per individual worm was calculated by genomic qPCR using  
703 primers for a single-copy *Wolbachia* gene (*wsp*; accession AAW71020). Each treatment  
704 or control group had 8 (or 9) biological replicates, and each replicate contained 3 male  
705 worms. Significance was determined by a single factor ANOVA, followed by t-tests  
706 between each treatment group and the control using a Bonferroni correction.

707 The Worminator system (Storey *et al.*, 2014) was used to assess changes in motility  
708 upon drug treatment. Motility of adult female worms was assessed using one female  
709 worm per well in a 12 well plate. Each treatment or control had 8 biological replicates.

710

## 711 **DATA AVAILABILITY**

712 All of our metabolic models—the unconstrained and lifecycle stage-specific variants—are  
713 freely available at [https://github.com/ParkinsonLab/Brugia\\_metabolic\\_network](https://github.com/ParkinsonLab/Brugia_metabolic_network).

714 Transcriptomics data generated for the *B. malayi* molt (lifecycle stages L3 to L3D6 to  
715 L3D9) are available through the Sequence Read Archive (PRJNA557263). Other  
716 transcriptomics data used in this study are also available through the Sequence Read  
717 Archive (SRP090644).

718 All of our metabolomics data – from both the hybrid and predictive analyses – are freely  
719 available at [https://github.com/ParkinsonLab/Brugia\\_metabolic\\_network](https://github.com/ParkinsonLab/Brugia_metabolic_network).



720

721 **ACKNOWLEDGEMENTS**

722 This research was supported by a grant to JP and EG from the National Institutes of  
723 Health (R21AI126466). Additional sources of funding include the Natural Sciences and  
724 Engineering Research Council to JP (NSERC; RGPIN-2014-06664). NN was supported  
725 by a student Restracom fellowship given by the Hospital for Sick Children. Funding for  
726 AG was provided by the T32 Ruth L. Kirschstein Institutional National Research Service  
727 Award (T32AI007180) and the F31 Ruth L. Kirschstein Pre-doctoral Individual NRSA  
728 (F31AI131527). Worms for this study were provided by FR3 (Filariasis Research  
729 Reagent Resource Center; BEI Resources, Manassas, VA, USA). New York  
730 University's Genomics Core (GenCore) is supported by the Zegar Family Foundation.

## 731 REFERENCES

- 732 Agarwal,K. *et al.* (2015) Twenty-eight day safety, antiviral activity, and pharmacokinetics  
733 of tenofovir alafenamide for treatment of chronic hepatitis B infection. *J. Hepatol.*,  
734 **62**, 533–540.
- 735 Aljayyousi,G. *et al.* (2017) Short-course, high-dose rifampicin achieves Wolbachia  
736 depletion predictive of curative outcomes in preclinical models of lymphatic filariasis  
737 and onchocerciasis. *Sci. Rep.*, **7**.
- 738 Armstrong,C.M. *et al.* (2015) Resistance to the antimicrobial agent fosmidomycin and  
739 an FR900098 prodrug through mutations in the deoxyxylulose phosphate  
740 reductoisomerase gene (*dxr*). *Antimicrob. Agents Chemother.*, **59**, 5511–5519.
- 741 Awadzi,K. *et al.* (2004) An investigation of persistent microfilaridermias despite multiple  
742 treatments with ivermectin, in two onchocerciasis-endemic foci in Ghana. *Ann.*  
743 *Trop. Med. Parasitol.*, **98**, 231–249.
- 744 Aziz,R.K. *et al.* (2015) Systems biology-guided identification of synthetic lethal gene  
745 pairs and its potential use to discover antibiotic combinations. *Sci. Rep.*, **5**.
- 746 Bakker,B.M. *et al.* (2001) Stoichiometry and compartmentation of NADH metabolism in  
747 *Saccharomyces cerevisiae*. In, *FEMS Microbiology Reviews.*, pp. 15–37.
- 748 Bateman,A. *et al.* (2015) UniProt: A hub for protein information. *Nucleic Acids Res.*
- 749 Berg,J. *et al.* (2002) *Biochemistry*.
- 750 Del Borrello,S. *et al.* (2019) Rhoquinone biosynthesis in *C. elegans* requires  
751 precursors generated by the kynurenine pathway. *Elife*.
- 752 Boussinesq,M. *et al.* (1998) Three probable cases of LOA loa encephalopathy following  
753 ivermectin treatment for onchocerciasis. *Am. J. Trop. Med. Hyg.*, **58**, 461–469.
- 754 Boussinesq,M. *et al.* (2006) What are the mechanisms associated with post-ivermectin  
755 serious adverse events? *Trends Parasitol.*, **22**, 244–246.
- 756 Bremer,J. and Davis,E.J. (1975) Studies on the active transfer of reducing equivalents  
757 into mitochondria via the malate-aspartate shuttle. *BBA - Bioenerg.*, **376**, 387–397.

- 758 Butler, J.A. *et al.* (2012) Profiling the Anaerobic Response of *C. elegans* Using GC-MS.  
759 *PLoS One*, **7**.
- 760 Camacho, C. *et al.* (2009) BLAST+: Architecture and applications. *BMC Bioinformatics*,  
761 **10**, 1.
- 762 Chavali, A.K. *et al.* (2008) Systems analysis of metabolism in the pathogenic  
763 trypanosomatid *Leishmania major*. *Mol. Syst. Biol.*, **4**, 177.
- 764 Chen, W.W. *et al.* (2016) Absolute Quantification of Matrix Metabolites Reveals the  
765 Dynamics of Mitochondrial Metabolism. *Cell*.
- 766 Chiappino-Pepe, A. *et al.* (2017) Bioenergetics-based modeling of *Plasmodium*  
767 *falciparum* metabolism reveals its essential genes, nutritional requirements, and  
768 thermodynamic bottlenecks. *PLoS Comput. Biol.*
- 769 Claudel-Renard, C. *et al.* (2003) Enzyme-specific profiles for genome annotation:  
770 PRIAM. *Nucleic Acids Res.*
- 771 Cotton, J.A. *et al.* (2016) The genome of *Onchocerca volvulus*, agent of river blindness.  
772 *Nat. Microbiol.*, **2**, 16216.
- 773 Dang, Q. *et al.* (2009) Fructose-1,6-bisphosphatase inhibitors. 1. Purine phosphonic  
774 acids as novel AMP mimics. *J. Med. Chem.*, **52**, 2880–2898.
- 775 Dang, Q. *et al.* (2010) Fructose-1,6-bisphosphatase inhibitors. 2. Design, synthesis, and  
776 structure-activity relationship of a series of phosphonic acid containing  
777 benzimidazoles that function as 5'-adenosinemonophosphate (AMP) mimics. *J.*  
778 *Med. Chem.*, **53**, 441–451.
- 779 Darby, A.C. *et al.* (2012) Analysis of gene expression from the *Wolbachia* genome of a  
780 filarial nematode supports both metabolic and defensive roles within the symbiosis.  
781 *Genome Res.*, **22**, 2467–2477.
- 782 Davies, M. *et al.* (2015) ChEMBL web services: Streamlining access to drug discovery  
783 data and utilities. *Nucleic Acids Res.*, **43**, W612–W620.
- 784 Debrah, A.Y. *et al.* (2009) Reduction in levels of plasma vascular endothelial growth

- 785 factor-A and improvement in hydrocele patients by targeting endosymbiotic  
786 *Wolbachia* sp. in *Wuchereria bancrofti* with doxycycline. *Am. J. Trop. Med. Hyg.*,  
787 **80**, 956–963.
- 788 Eberhard, M.L. *et al.* (1991) Evidence of nonsusceptibility to diethylcarbamazine in  
789 *wuchereria bancrofti*. *J. Infect. Dis.*, **163**, 1157–1160.
- 790 Ebrahim, A. *et al.* (2013) COBRApy: COntstraints-Based Reconstruction and Analysis for  
791 Python. *BMC Syst. Biol.*, **7**, 74.
- 792 Ejim, L. *et al.* (2011) Combinations of antibiotics and nonantibiotic drugs enhance  
793 antimicrobial efficacy. *Nat. Chem. Biol.*, **7**, 348–350.
- 794 Eng, J.K.L. *et al.* (2006) Ivermectin selection on  $\beta$ -tubulin: Evidence in *Onchocerca*  
795 *volvulus* and *Haemonchus contortus*. *Mol. Biochem. Parasitol.*, **150**, 229–235.
- 796 Foster, J. *et al.* (2005) The *Wolbachia* genome of *Brugia malayi*: Endosymbiont evolution  
797 within a human pathogenic nematode. *PLoS Biol.*, **3**, 0599–0614.
- 798 Gardon, J. *et al.* (1997) Serious reactions after mass treatment of onchocerciasis with  
799 ivermectin in an area endemic for *Loa loa* infection. *Lancet*, **350**, 18–22.
- 800 Gaulton, A. *et al.* (2012) ChEMBL: A large-scale bioactivity database for drug discovery.  
801 *Nucleic Acids Res.*, **40**.
- 802 Gaulton, A. *et al.* (2017) The ChEMBL database in 2017. *Nucleic Acids Res.*, **45**, D945–  
803 D954.
- 804 Ghedin, E. *et al.* (2009) *Brugia malayi* gene expression in response to the targeting of  
805 the *Wolbachia* endosymbiont by tetracycline treatment. *PLoS Negl. Trop. Dis.*, **3**.
- 806 Ghedin, E. *et al.* (2007) Draft genome of the filarial nematode parasite *Brugia malayi*.  
807 *Science (80-. )*, **317**, 1756–1760.
- 808 Gleave, K. *et al.* (2016) Filarial infection influences mosquito behaviour and fecundity.  
809 *Sci. Rep.*
- 810 Grote, A. *et al.* (2017) Defining *Brugia malayi* and *Wolbachia* symbiosis by stage-specific  
811 dual RNA-seq. *PLoS Negl. Trop. Dis.*, **11**.

- 812 Grote,A. *et al.* (2019) Prediction pipeline for discovery of regulatory motifs associated  
813 with *Brugia malayi* molting. *Submitted*.
- 814 Gyapong,J.O. *et al.* (2005) Treatment strategies underpinning the global programme to  
815 eliminate lymphatic filariasis. *Expert Opin. Pharmacother.*, **6**, 179–200.
- 816 Hung,S.S. *et al.* (2010) DETECT-a density estimation tool for enzyme classification and  
817 its application to *Plasmodium falciparum*. *Bioinformatics*.
- 818 Jomaa,H. *et al.* (1999) Inhibitors of the nonmevalonate pathway of isoprenoid  
819 biosynthesis as antimalarial drugs. *Science (80-. )*, **285**, 1573–1576.
- 820 Kaplan,R.M. and Vidyashankar,A.N. (2012) An inconvenient truth: Global worming and  
821 anthelmintic resistance. *Vet. Parasitol.*, **186**, 70–78.
- 822 Karp,P.D. *et al.* (2016) Pathway tools version 19.0 update: Software for  
823 pathway/genome informatics and systems biology. *Brief. Bioinform.*
- 824 Kaur,R. *et al.* (2017) Fructose-1,6-bisphosphatase inhibitors: A new valid approach for  
825 management of type 2 diabetes mellitus. *Eur. J. Med. Chem.*, **141**, 473–505.
- 826 Kim,D. *et al.* (2013) TopHat2: Accurate alignment of transcriptomes in the presence of  
827 insertions, deletions and gene fusions. *Genome Biol.*, **14**.
- 828 Kondrashov,F.A. *et al.* (2006) Evolution of glyoxylate cycle enzymes in Metazoa:  
829 Evidence of multiple horizontal transfer events and pseudogene formation. *Biol.*  
830 *Direct*, **1**.
- 831 Lee,D.S. *et al.* (2009) Comparative genome-scale metabolic reconstruction and flux  
832 balance analysis of multiple *Staphylococcus aureus* genomes identify novel  
833 antimicrobial drug targets. *J. Bacteriol.*, **191**, 4015–4024.
- 834 Lehár,J. *et al.* (2009) Synergistic drug combinations tend to improve therapeutically  
835 relevant selectivity. *Nat. Biotechnol.*, **27**, 659–666.
- 836 Li,B.W. *et al.* (2009) Transcriptomes and pathways associated with infectivity, survival  
837 and immunogenicity in *Brugia malayi* L3. *BMC Genomics*.
- 838 Molyneux,D.H. *et al.* (2014) Multidimensional complexities of filariasis control in an era

- 839 of large-scale mass drug administration programmes: A can of worms. *Parasites*  
840 *and Vectors*, **7**.
- 841 Muller, M. *et al.* (2012) Biochemistry and Evolution of Anaerobic Energy Metabolism in  
842 Eukaryotes. *Microbiol. Mol. Biol. Rev.*, **76**, 444–495.
- 843 Oberhardt, M.A. *et al.* (2008) Genome-scale metabolic network analysis of the  
844 opportunistic pathogen *Pseudomonas aeruginosa* PAO1. *J. Bacteriol.*, **190**, 2790–  
845 2803.
- 846 Orth, J.D. *et al.* (2010) What is flux balance analysis? *Nat. Biotechnol.*, **28**, 245–248.
- 847 Pfeiffer, T. and Morley, A. (2014) An evolutionary perspective on the Crabtree effect.  
848 *Front. Mol. Biosci.*, **1**.
- 849 Postma, E. *et al.* (1989) Enzymic analysis of the crabtree effect in glucose-limited  
850 chemostat cultures of *Saccharomyces cerevisiae*. *Appl. Environ. Microbiol.*, **55**,  
851 468–477.
- 852 Rao, R.U. *et al.* (2012) Effects of Doxycycline on gene expression in *Wolbachia* and  
853 *Brugia malayi* adult female worms in vivo. *J. Biomed. Sci.*, **19**.
- 854 Robinson, M.D. *et al.* (2010) edgeR: a Bioconductor package for differential expression  
855 analysis of digital gene expression data. *Bioinformatics*, **26**.
- 856 Safak Yilmaz, L. and Walhout, A.J.M. (2016) A *Caenorhabditis elegans* Genome-Scale  
857 Metabolic Network Model. *Cell Syst.*, **2**, 297–311.
- 858 Schellenberger, J. *et al.* (2011) Quantitative prediction of cellular metabolism with  
859 constraint-based models: The COBRA Toolbox v2.0. *Nat. Protoc.*, **6**, 1290–1307.
- 860 Schomburg, I. *et al.* (2002) BRENDA: A resource for enzyme data and metabolic  
861 information. *Trends Biochem. Sci.*
- 862 Schwab, A.E. *et al.* (2005) Detection of benzimidazole resistance-associated mutations  
863 in the filarial nematode *Wuchereria bancrofti* and evidence for selection by  
864 albendazole and ivermectin combination treatment. *Am. J. Trop. Med. Hyg.*, **73**,  
865 234–238.

- 866 Simón-Manso, Y. *et al.* (2013) Metabolite profiling of a NIST standard reference material  
867 for human plasma (SRM 1950): GC-MS, LC-MS, NMR, and clinical laboratory  
868 analyses, libraries, and web-based resources. *Anal. Chem.*
- 869 Smith, C.A. *et al.* (2005) METLIN: A metabolite mass spectral database. In, *Therapeutic*  
870 *Drug Monitoring.*
- 871 Song, C. *et al.* (2013) Metabolic reconstruction identifies strain-specific regulation of  
872 virulence in *Toxoplasma gondii*. *Mol. Syst. Biol.*, **9**.
- 873 Spitzer, M. *et al.* (2011) Cross-species discovery of syncretic drug combinations that  
874 potentiate the antifungal fluconazole. *Mol. Syst. Biol.*, **7**.
- 875 Storey, B. *et al.* (2014) Utilization of computer processed high definition video imaging  
876 for measuring motility of microscopic nematode stages on a quantitative scale: 'The  
877 Worminator'. *Int. J. Parasitol. Drugs Drug Resist.*, **4**, 233–243.
- 878 Taylor, M.J. *et al.* (2010) Lymphatic filariasis and onchocerciasis. In, *The Lancet.*, pp.  
879 1175–1185.
- 880 Taylor, M.J. *et al.* (2019) Preclinical development of an oral anti-Wolbachia macrolide  
881 drug for the treatment of lymphatic filariasis and onchocerciasis. *Sci. Transl. Med.*
- 882 Taylor, M.J. *et al.* (2013) Wolbachia filarial interactions. *Cell. Microbiol.*, **15**, 520–526.
- 883 Tian, W. *et al.* (2004) EFICAZ: A comprehensive approach for accurate genome-scale  
884 enzyme function inference. *Nucleic Acids Res.*
- 885 Tielens, A.G.M. *et al.* (2010) Acetate formation in the energy metabolism of parasitic  
886 helminths and protists. *Int. J. Parasitol.*, **40**, 387–397.
- 887 Trapnell, C. *et al.* (2013) Differential analysis of gene regulation at transcript resolution  
888 with RNA-seq. *Nat. Biotechnol.*, **31**, 46–53.
- 889 Trapnell, C. *et al.* (2010) Transcript assembly and quantification by RNA-Seq reveals  
890 unannotated transcripts and isoform switching during cell differentiation. *Nat.*  
891 *Biotechnol.*, **28**, 511–515.
- 892 Tsukada, T. *et al.* (2010) Structure-based drug design of tricyclic 8H-indeno[1,2-

- 893 d][1,3]thiazoles as potent FBPase inhibitors. *Bioorganic Med. Chem. Lett.*, **20**,  
894 1004–1007.
- 895 Umeda,T. *et al.* (2011) Molecular basis of fosmidomycin’s action on the human malaria  
896 parasite Plasmodium falciparum. *Sci. Rep.*, **1**.
- 897 Voronin,D. *et al.* (2016) Glucose and glycogen metabolism in brugia malayi is  
898 associated with wolbachia symbiont fitness. *PLoS One*, **11**.
- 899 Vos,T. *et al.* (2016) Global, regional, and national incidence, prevalence, and years  
900 lived with disability for 310 diseases and injuries, 1990–2015: a systematic analysis  
901 for the Global Burden of Disease Study 2015. *Lancet*, **388**, 1545–1602.
- 902 Wright,S.W. *et al.* (2003) 3-(2-Carboxy-ethyl)-4,6-dichloro-1H-indole-2-carboxylic acid:  
903 An allosteric inhibitor of fructose-1,6-bisphosphatase at the AMP site. *Bioorganic*  
904 *Med. Chem. Lett.*, **13**, 2055–2058.
- 905 Yuan,M. *et al.* (2017) Structures of Leishmania Fructose-1,6-Bisphosphatase Reveal  
906 Species-Specific Differences in the Mechanism of Allosteric Inhibition. *J. Mol. Biol.*,  
907 **429**, 3075–3089.
- 908
